# Supplementary figures and images for: The Comparative Safety of Epirubicin and Cyclophosphamide versus Docetaxel and Cyclophosphamide in Lymph Node-Negative, HR-Positive, HER2-Negative Breast Cancer (ELEGANT): A Randomized Trial
Source: MDPI journal article supplement (doi:10.3390/cancers14133221), 2022-06-30

## CONSORT 2010 Flow Diagram of trial ELEGANT

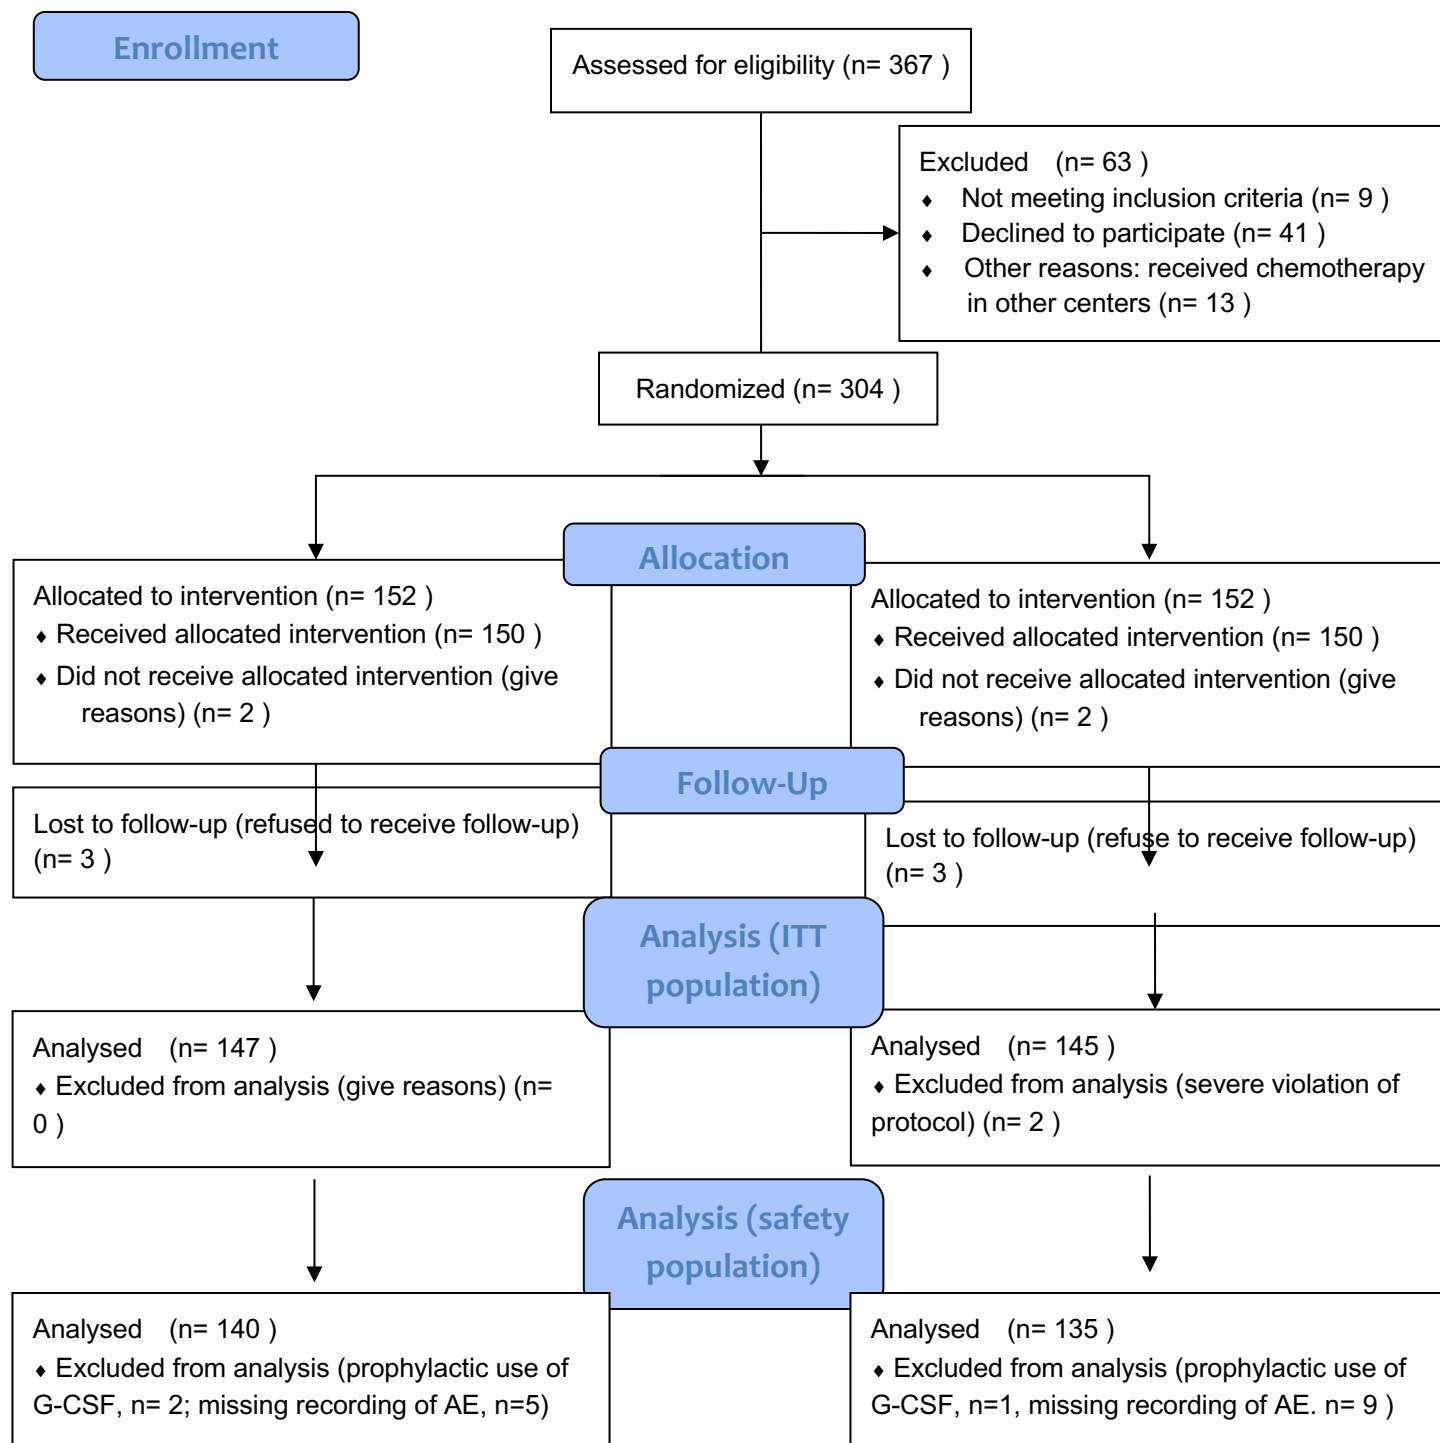

Supplement: s1 [file s1]
